# Supplementary material for: Integrated response to lead in saline aquaponics: plant-based remediation, microbial community shifts, and shrimp health
Source: Research Square preprint supplement (doi:10.21203/rs.3.rs-6960017/v1), 2025-06-30
Supplement: Supplementary file 1 [file 6b41ed896269d50e8b5077e4.docx]

**Supplementary Table S1.**

Weekly variation of nitrogenous nutrients (ammonium, nitrite, nitrate), total phosphorus, and potassium in the aquaponic system during the cultivation period. Water samples were collected at the inlet of the biofilter unit and at the outlet of the hydroponic system.

| Water quality | Ammonium (NH3) | | Nitrite (NO₂⁻) | | Nitrate (NO₃⁻) | | Total Phosphorus (TP) | | Potassium (K⁺) | |
| --- | --- | --- | --- | --- | --- | --- | --- | --- | --- | --- |
| Week | Inlet | Outlet | Inlet | Outlet | Inlet | Outlet | Inlet | Outlet | Inlet | Outlet |
| 1 | 0.310 | 0.240 | 0.236 | 0.303 | 3.00 | 5.60 | 3.27 | 2.34 | 111.20 | 82.50 |
| 2 | 0.360 | 0.270 | 0.245 | 0.326 | 2.60 | 4.60 | 0.95 | 1.84 | 370.70 | 90.00 |
| 3 | 0.360 | 0.280 | 0.237 | 0.311 | 3.10 | 4.30 | 1.99 | 1.75 | 107.00 | 87.50 |
| 4 | 0.210 | 0.120 | 0.168 | 0.208 | 3.10 | 5.10 | 0.71 | 1.31 | 240.00 | 72.50 |
| 5 | 0.220 | 0.130 | 0.169 | 0.224 | 3.30 | 4.60 | 2.46 | 1.48 | 237.00 | 95.00 |
| 6 | 0.220 | 0.213 | 0.171 | 0.222 | 3.80 | 4.30 | 1.36 | 1.17 | 138.00 | 92.00 |
| 7 | 0.280 | 0.212 | 0.087 | 0.198 | 2.90 | 2.90 | 1.26 | 1.14 | 125.00 | 101.00 |
| 8 | 0.270 | 0.109 | 0.089 | 0.108 | 3.00 | 2.35 | 0.69 | 1.11 | 139.00 | 95.00 |

Values are expressed in mg/L. "Inlet" refers to the nutrient solution entering the integrated biofilter–hydroponic system each week, and "outlet" refers to the solution collected after circulation through the plants.

**Supplementary Table S2.**
Concentrations of proteins, lipids, and carbohydrates in the hemolymph of Litopenaeus vannamei exposed to lead and in control conditions. Values are expressed as mean ± standard error (SE), based on five replicates per treatment (n = 5). Measurements correspond to individual samples collected during the experimental period.

| Sample | Protein (mg/mL) | | Lipids  (mg/mL) | | Carbohydrate (mg/mL) | | |
| --- | --- | --- | --- | --- | --- | --- | --- |
|  | Pb-Exposed | Control | Pb-Exposed | Control | Pb-Exposed | Control |
| 1 | 245.74 ±0.40 | 88.17 ±0.03 | 13.53 ±0.04 | 4.03 ±0.03 | 0.94 ±0.11 | 1.09 ±0.04 |
| 2 | 241.36 ±0.38 | 111.93 ±0.05 | 6.92 ±0.02 | 4.11 ±0.04 | 1.11 ±0.05 | 1.00 ±0.03 |
| 3 | 239.92 ±0.39 | 100.68 ±0.05 | 6.71 ±0.03 | 8.60 ±0.09 | 1.32 ±0.06 | 1.07 ±0.08 |
| 4 | 251.54 ±0.42 | 113.78 ±0.09 | 13.35 ±0.08 | 10.93 ±0.07 | 1.16 ±0.06 | 1.08 ±0.03 |
| 5 | 257.48 ±0.41 | 125.64 ±0.06 | 16.78 ±0.05 | 7.83 ±0.09 | 1.29 ±0.04 | 1.11 ±0.05 |
| 6 | 261.66 ±0.43 | 112.51 ±0.05 | 13.06 ±0.08 | 6.57 ±0.08 | 1.20 ±0.07 | 1.08 ±0.06 |
| 7 | 271.79 ±0.49 | 106.91 ±0.05 | 14.96 ±0.06 | 7.64 ±0.03 | 1.22 ±0.07 | 1.31±0.08 |
| 8 | 263.32 ±0.47 | 118.51 ±0.11 | 10.31 ±0.07 | 10.61 ±0.06 | 1.18 ±0.02 | 1.18 ±0.12 |
| (mean ±SE; n=5) | | | | | | |

The statistical analysis revealed a significant effect of lead treatment on lipid levels (p = 0.0001) and time (p = 0.0383), with no significant interaction (p = 0.0860). Lipid concentrations were higher in Pb-exposed shrimp and varied across weeks. For carbohydrate (CHD), time had a significant effect (p = 0.0369), but neither treatment (p = 0.1047) nor interaction (p = 0.1718) was significant. In contrast, protein levels were significantly affected by treatment (p < 0.0001), but not by time (p = 0.4140) or interaction (p = 0.8792), indicating a sustained difference between groups across all weeks.
